# Supplementary material for: Highly sensitive determination of arsenic in water samples by hydrogen-doped solution anode glow discharge-optical emission spectrometry
Source: Royal Society of Chemistry journal article supplement (doi:10.1039/d2ja00382a), 2023-01-01
Supplement: d2ja00382a1.pdf [file d2ja00382a1.pdf]

# Highly Sensitive Determination of Arsenic in Water Samples by Hydrogen-Doped Solution Anode Glow Discharge- Optical Emission Spectrometry

Ying Liu,<sup>†</sup> Chun Yang,<sup>†</sup> Peng-Ju Xing,<sup>†</sup> Xing Liu,<sup>†</sup> Jin-Zhao Liu<sup>§</sup>, and Zhen-Li  
Zhu<sup>\*,†,‡</sup>

<sup>†</sup> State Key Laboratory of Biogeology and Environmental Geology, School of Earth Sciences, China University of Geosciences, Wuhan 430074, China

<sup>§</sup> Faculty of Materials Science and Chemistry, China University of Geosciences, Wuhan 430074, China

<sup>‡</sup> State Environmental Protection Key Laboratory of Source Apportionment and Control of Aquatic Pollution, Ministry of Ecology and Environment, Wuhan 430074, China

## Corresponding Author\*

Tel: +86-27-6788-3452;

Fax: +86-27-6788-3456.

E-mail: [zllzhu@cug.edu.cn](mailto:zllzhu@cug.edu.cn);

## Table of Contents

Figure S1. Fluorescence spectra of As detected by SAGD-AFS under Ar and Ar-H<sub>2</sub> atmosphere.

Figure S2. The emission spectra of As under Ar-H<sub>2</sub> and He-H<sub>2</sub> (including the background spectra).

Figure S3. a) The emission spectra and b) the comparison of normalized emission signal normalized signal in 193.7 nm of As (III) and As(V) by hydrogen-doped SAGD-OES.

Figure S4. Optimization of the SAGD-OES parameters: the effect of a) discharge current, b) pH, c) discharge gap and d) sample flow rate on As emission signal.

Figure S5. a) The standard curve and b) emission spectra of As at different concentrations.

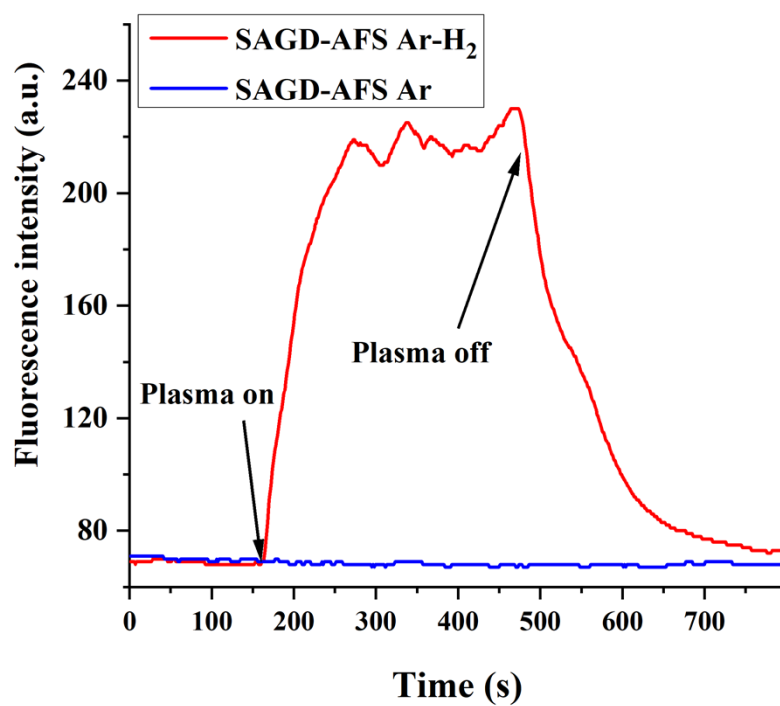

Figure S1. Fluorescence spectra of As detected by SAGD-AFS under Ar and Ar-H<sub>2</sub> atmosphere.

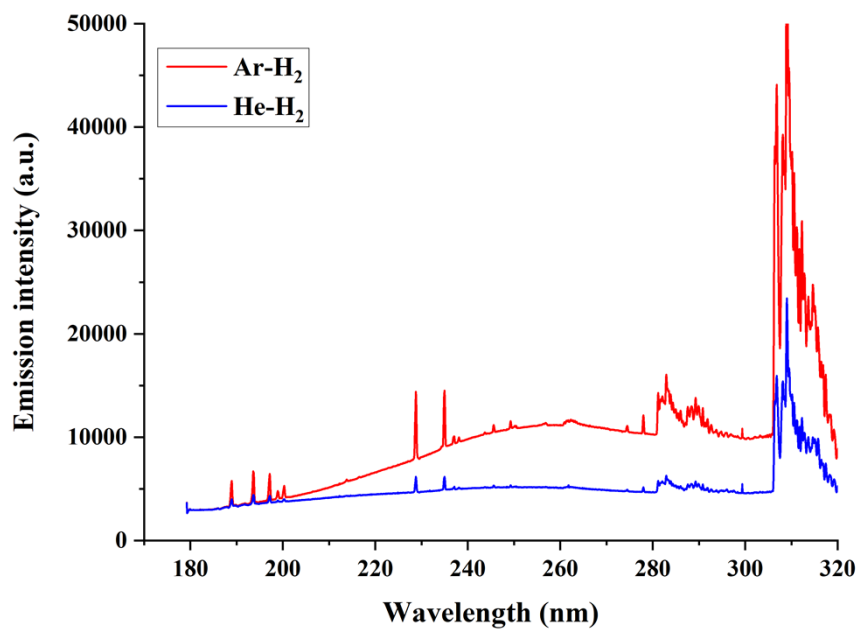

Figure S2. The emission spectra of As under Ar-H<sub>2</sub> and He-H<sub>2</sub> (including the background spectra).

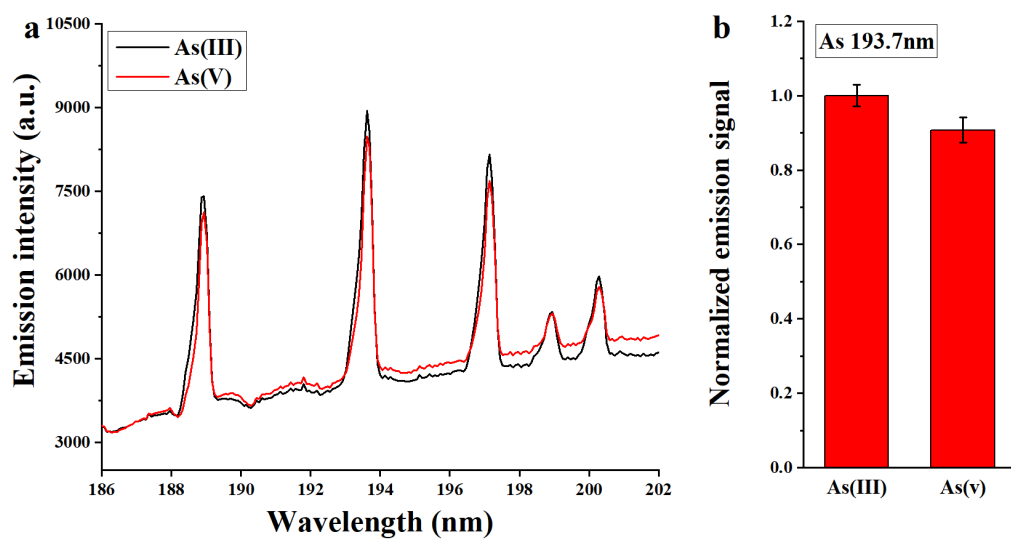

Figure S3. a) The emission spectra and b) the comparison of normalized emission signal normalized signal in 193.7 nm of As (III) and As(V) by hydrogen-doped SAGD-OES.

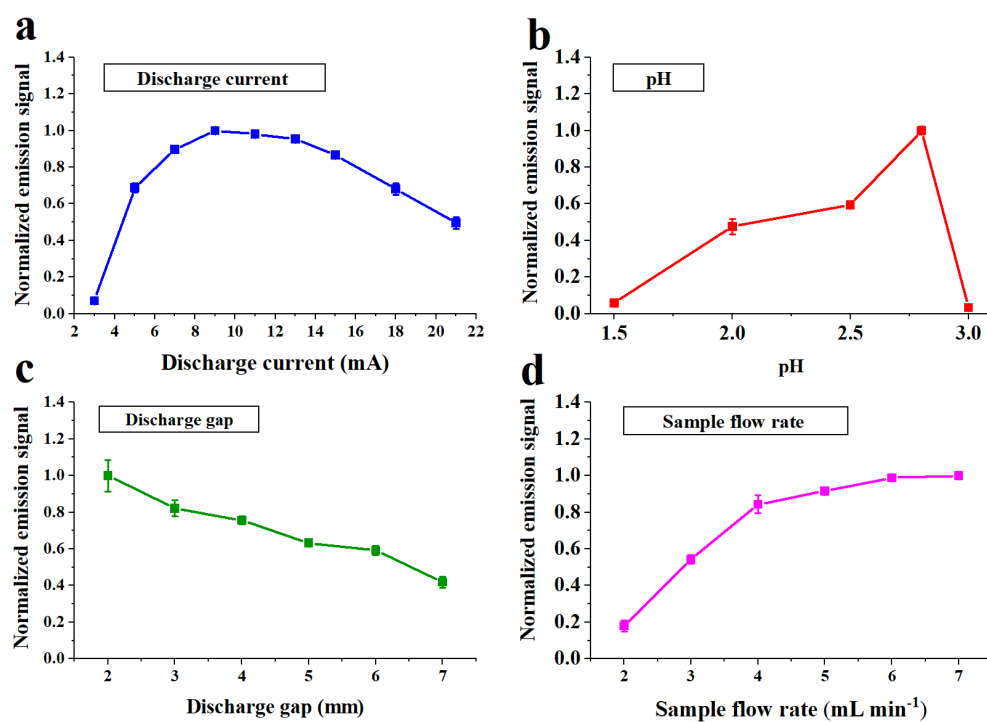

Figure S4. Optimization of the SAGD-OES parameters: the effect of a) discharge current, b) pH, c) discharge gap and d) sample flow rate on As emission signal (Ar flow rate: 300 mL min<sup>-1</sup>; H<sub>2</sub> flow rate: 15 mL min<sup>-1</sup>.)

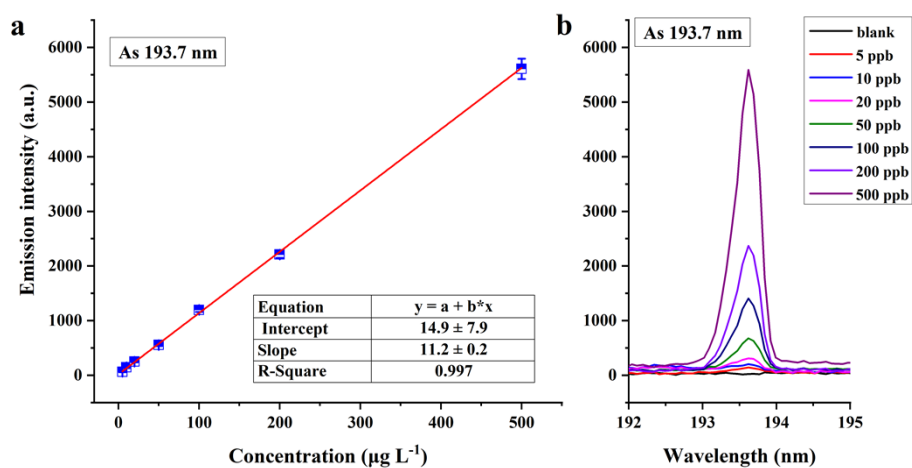

Figure S5. a) The standard curve and b) emission spectra of As at different concentrations.

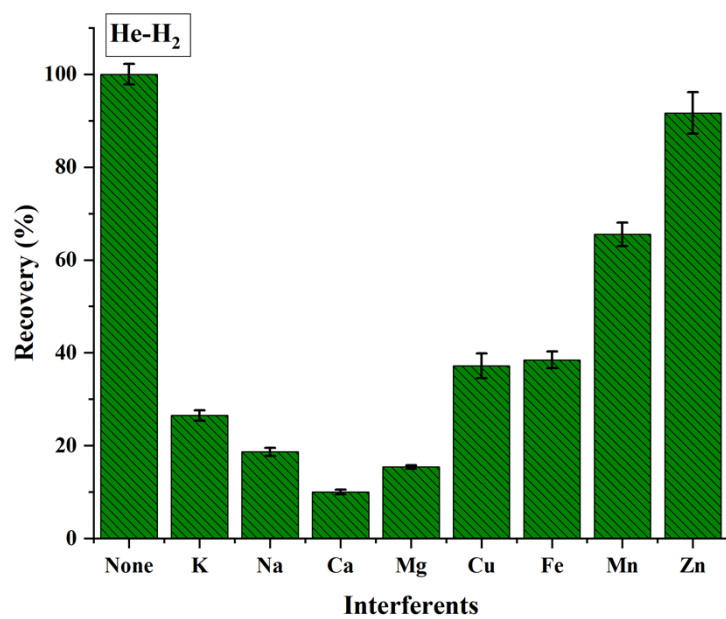

Figure S6. The effect of concomitant ions (10 mg L<sup>-1</sup>) on recovery of As detected by He-H<sub>2</sub> SAGD-OES.
